# Supplementary material for: Low cancer yield in PI-RADS 3 upgraded to 4 by dynamic contrast-enhanced MRI: is it time to reconsider scoring categorization?
Source: PubMed Central journal article supplement (PMC10326099; doi:10.1007/s00330-023-09605-0), 2023-04-13
Supplement: 330_2023_9605_MOESM1_ESM.pdf [file 330_2023_9605_MOESM1_ESM.pdf]

## **ELECTRONIC SUPPLEMENTARY MATERIAL**

### **Low cancer yield in PI-RADS 3 upgraded to 4 by Dynamic contrast-enhanced MRI: is it time to reconsider scoring categorization?**

**Supplementary Table 1.** DWI scoring system according to PI-RADS v2.1 recommendations [17]. DWI, diffusion weighted imaging; ADC, apparent diffusion coefficient; PI-RADS, Prostate Imaging - Reporting and Data System.

| <b>DWI SCORE</b> | <b>DEFINITION</b>                                                                                                                                                                |
|------------------|----------------------------------------------------------------------------------------------------------------------------------------------------------------------------------|
| <b>1</b>         | No evidence of alterations on high b-value DWI and on ADC map                                                                                                                    |
| <b>2</b>         | Linear/wedge shaped hyperintensity on high b-value DWI and/or linear/wedge shaped hypointensity on ADC map                                                                       |
| <b>3</b>         | Focal mild hyperintensity on high b-value DWI and/or focal mild hypointensity on ADC map; marked hyperintensity on high b-value DWI or marked hypointensity on ADC, but not both |
| <b>4</b>         | Focal marked hyperintensity on high b-value DWI and marked hypointensity on ADC (<1.5cm)                                                                                         |
| <b>5</b>         | Same characteristics as 4 but $\geq 1.5$ cm or evidence of extraprostatic extension                                                                                              |

**Supplementary Table 2.** Summary of the MR Acquisition Parameters.  
TE, Time of echo; TR, Repetition time.

| Manufacturer                             | SIEMENS      | GENERAL ELECTRIC |
|------------------------------------------|--------------|------------------|
| Magnet (Tesla)                           | 3            | 3                |
| Manufacture year                         | 2021         | 2010             |
| Year of last update                      | 2022         | 2020             |
| <b>T2-WI</b>                             |              |                  |
| TE (msec)                                | 134          | 134              |
| TR (msec)                                | 6000         | 6000             |
| In-plane resolution (mm x mm)            | 0,4 x 0,4    | 0,562 x 0,804    |
| Field of view                            | 18x18        | 18x18            |
| Slice thickness (mm)                     | 3            | 3                |
| Matrix size                              | 384 x 384    | 384 x 384        |
| <b>DWI</b>                               |              |                  |
| TE (msec)                                | 75           | 75               |
| TR (msec)                                | 4300         | 4300             |
| In-plane resolution (mm x mm)            | 1,8 x 1,8    | 1,8 x 1,8        |
| Field of view                            | 18x18        | 18x18            |
| Slice thickness (mm)                     | 3            | 3                |
| Multiple b values (sec/mm <sup>2</sup> ) | 100-800-1000 | 100-800-1000     |
| High b value (sec/mm <sup>2</sup> )      | 2000         | 2000             |
| Matrix size                              | 90 x 90      | 90 x 90          |
| <b>DCE</b>                               |              |                  |
| TE (msec)                                | 1            | 1                |
| TR (msec)                                | 3            | 3                |
| In-plane resolution (mm x mm)            | 1,1 x 1,2    | 1,1 x 1,2        |
| Field of view                            | 18x18        | 18x18            |
| Slice thickness (mm)                     | 3            | 3                |
| Fat suppression / subtraction            | No           | No               |
| Temporal resolution (seconds)            | 6            | 6                |
| Matrix size                              | 160 x 140    | 160 x 140        |
